# Supplementary material for: Global burden and trends in intracerebral hemorrhage and subarachnoid hemorrhage attributable to metabolic risks in females over 50 years old from 1990 to 2021, with projections to 2050: a cross-sectional study
Source: Research Square preprint supplement (doi:10.21203/rs.3.rs-6412170/v1), 2025-07-02
Supplement: Supplementary file 1 [file 895bbcd19588cb18a43d501a.docx]

**Table legend**

**Table S1.** The number of deaths cases and the age-standardized deaths rate of intracerebral hemorrhage attributable to metabolic risks in females over 50 years old in 1990 and 2021, and its trends from 1990 to 2021 globally.

**Table S2.** The number of DALYs cases and the age-standardized DALYs rate of intracerebral hemorrhage attributable to metabolic risks in females over 50 years old in 1990 and 2021, and its trends from 1990 to 2021 globally.

**Table S3.** The number of YLDs cases and the age-standardized YLDs rate of intracerebral hemorrhage attributable to metabolic risks in females over 50 years old in 1990 and 2021, and its trends from 1990 to 2021 globally.

**Table S4.** The number of YLLs cases and the age-standardized YLLs rate of intracerebral hemorrhage attributable to metabolic risks in females over 50 years old in 1990 and 2021, and its trends from 1990 to 2021 globally.

**Table S5.** The number of deaths cases and the age-standardized deaths rate of subarachnoid hemorrhage attributable to metabolic risks in females over 50 years old in 1990 and 2021, and its trends from 1990 to 2021 globally.

**Table S6.** The number of DALYs cases and the age-standardized DALYs rate of subarachnoid hemorrhage attributable to metabolic risks in females over 50 years old in 1990 and 2021, and its trends from 1990 to 2021 globally.

**Table S7.** The number of YLDs cases and the age-standardized YLDs rate of subarachnoid hemorrhage attributable to metabolic risks in females over 50 years old in 1990 and 2021, and its trends from 1990 to 2021 globally.

**Table S8.** The number of YLLs cases and the age-standardized YLLs rate of subarachnoid hemorrhage attributable to metabolic risks in females over 50 years old in 1990 and 2021, and its trends from 1990 to 2021 globally.

**Figure legend**

**Figure S1.** Numbers and age-standardized rates of intracerebral hemorrhage attributable to metabolic risks in females over 50 years old-related deaths, DALYs, YLDs, and YLLs for different age groups in 2021. Abbreviations: YLDs, years lived with disability; YLLs, years of life lost.

**Figure S2.** Numbers and age-standardized rates of subarachnoid hemorrhage attributable to metabolic risks in females over 50 years old-related deaths, DALYs, YLDs, and YLLs for different age groups in 2021. Abbreviations: YLDs, years lived with disability; YLLs, years of life lost.

**Figure S3.** Numbers and age-standardized rates of intracerebral hemorrhage attributable to metabolic risks in females over 50 years old-related deaths, DALYs, YLDs, and YLLs for different SDI regions in 2021. Abbreviations: YLDs, years lived with disability; YLLs, years of life lost; SDI, Socio - demographic Index.

**Figure S4.** Numbers and age-standardized rates of subarachnoid hemorrhage attributable to metabolic risks in females over 50 years old-related deaths, DALYs, YLDs, and YLLs for different SDI regions in 2021. Abbreviations: YLDs, years lived with disability; YLLs, years of life lost; SDI, Socio - demographic Index.

**Figure S5.** Numbers and age-standardized rates of intracerebral hemorrhage attributable to metabolic risks in females over 50 years old-related deaths, DALYs, YLDs, and YLLs for different GBD regions in 2021. Abbreviations: YLDs, years lived with disability; YLLs, years of life lost; GBD, Global Burden of Disease.

**Figure S6.** Numbers and age-standardized rates of subarachnoid hemorrhage attributable to metabolic risks in females over 50 years old-related deaths, DALYs, YLDs, and YLLs for different GBD regions in 2021. Abbreviations: YLDs, years lived with disability; YLLs, years of life lost; GBD, Global Burden of Disease.

**Figure S7.** Numbers and age-standardized rates of intracerebral hemorrhage attributable to metabolic risks in females over 50 years old-related deaths, DALYs, YLDs, and YLLs across countries and territories in 2021. Abbreviations: YLDs, years lived with disability; YLLs, years of life lost.

**Figure S8.** Numbers and age-standardized rates of subarachnoid hemorrhage attributable to metabolic risks in females over 50 years old-related deaths, DALYs, YLDs, and YLLs across countries and territories in 2021. Abbreviations: YLDs, years lived with disability; YLLs, years of life lost.

**Figure S9.** Trends in the numbers and age-standardized rates of intracerebral hemorrhage attributable to metabolic risks in females over 50 years old-related deaths, DALYs, YLDs, and YLLs globally by age groups from 1990 to 2021. Abbreviations: YLDs, years lived with disability; YLLs, years of life lost.

**Figure S10.** Trends in the numbers and age-standardized rates of subarachnoid hemorrhage attributable to metabolic risks in females over 50 years old-related deaths, DALYs, YLDs, and YLLs globally by age groups from 1990 to 2021. Abbreviations: YLDs, years lived with disability; YLLs, years of life lost.

**Figure S11.** Trends in the numbers and age-standardized rates of intracerebral hemorrhage attributable to metabolic risks in females over 50 years old-related deaths, DALYs, YLDs, and YLLs globally by SDI regions from 1990 to 2021. Abbreviations: YLDs, years lived with disability; YLLs, years of life lost; SDI, Socio - demographic Index.

**Figure S12.** Trends in the numbers and age-standardized rates of subarachnoid hemorrhage attributable to metabolic risks in females over 50 years old-related deaths, DALYs, YLDs, and YLLs globally by SDI regions from 1990 to 2021. Abbreviations: YLDs, years lived with disability; YLLs, years of life lost; SDI, Socio - demographic Index.

**Figure S13.** Trends in the numbers and age-standardized rates of intracerebral hemorrhage attributable to metabolic risks in females over 50 years old-related deaths, DALYs, YLDs, and YLLs globally across countries and territories from 1990 to 2021. Abbreviations: YLDs, years lived with disability; YLLs, years of life lost.

**Figure S14.** Trends in the numbers and age-standardized rates of subarachnoid hemorrhage attributable to metabolic risks in females over 50 years old-related deaths, DALYs, YLDs, and YLLs globally across countries and territories from 1990 to 2021. Abbreviations: YLDs, years lived with disability; YLLs, years of life lost.

**Figure S15.** The predicted results in the intracerebral hemorrhage attributable to metabolic risks in females over 50 years old-related numbers and age-standardized rates of deaths, DALYs, YLDs, and YLLs by sex globally from 2022 to 2050 of the ARIMA model. Abbreviations: YLDs, years lived with disability; YLLs, years of life lost; ARIMA, Autoregressive Integrated Moving Average.

**Figure S16.** The predicted results in the subarachnoid hemorrhage attributable to metabolic risks in females over 50 years old-related numbers and age-standardized rates of deaths, DALYs, YLDs, and YLLs by sex globally from 2022 to 2050 of the ARIMA model. Abbreviations: YLDs, years lived with disability; YLLs, years of life lost; ARIMA, Autoregressive Integrated Moving Average.

**Figure S17.** The predicted results in the intracerebral hemorrhage attributable to metabolic risks in females over 50 years old-related numbers and age-standardized rates of deaths, DALYs, YLDs, and YLLs by sex globally from 2022 to 2050 of the ES model. Abbreviations: YLDs, years lived with disability; YLLs, years of life lost; ES, Exponential Smoothing.

**Figure S18.** The predicted results in the subarachnoid hemorrhage attributable to metabolic risks in females over 50 years old-related numbers and age-standardized rates of deaths, DALYs, YLDs, and YLLs by sex globally from 2022 to 2050 of the ES model. Abbreviations: YLDs, years lived with disability; YLLs, years of life lost; ES, Exponential Smoothing.
